# Supplementary material
Source: ML conference proceedings conference paper supplement (https://openreview.net/forum?id=tZGi06kk9y)
Supplement: supplementary_material [file attachment]

Case #FLARE23Ts\_0001  
(slice #24)

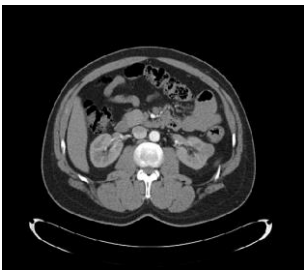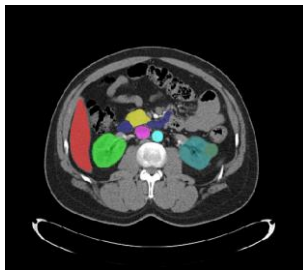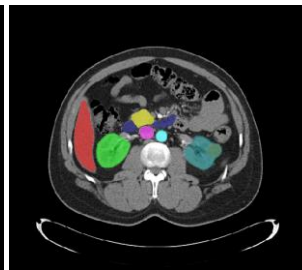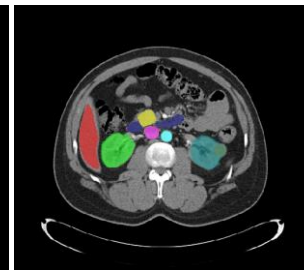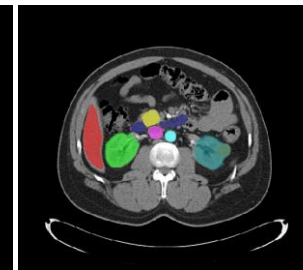

Case #FLARE23Ts\_0017  
(slice #255)

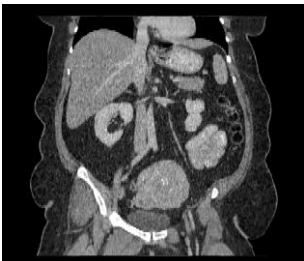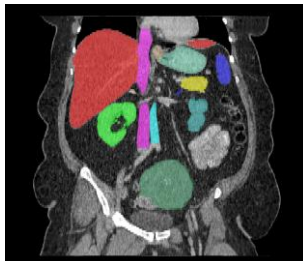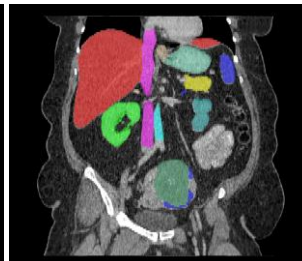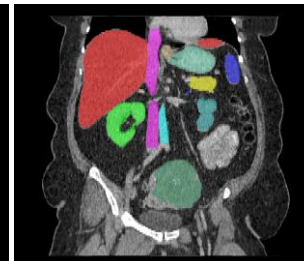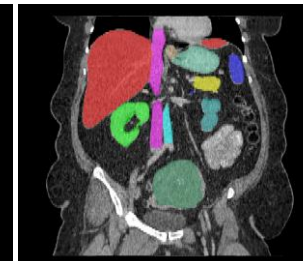

Case #FLARE23Ts\_0067  
(slice #259)

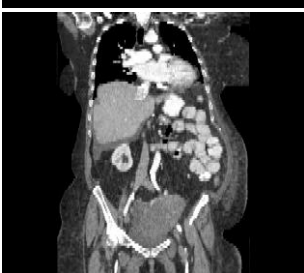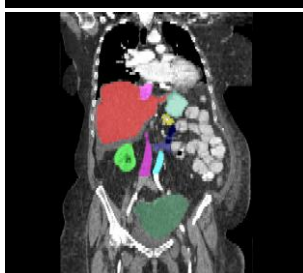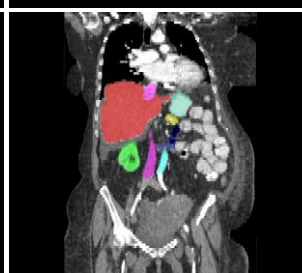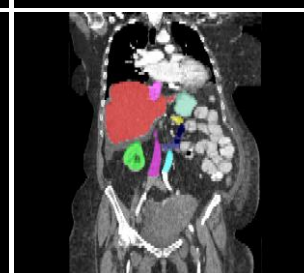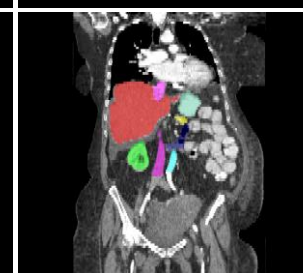

Case #FLARE23Ts\_0097  
(slice #31)

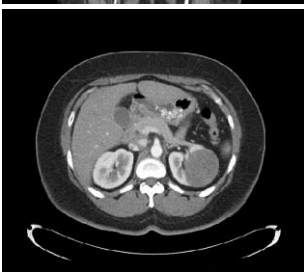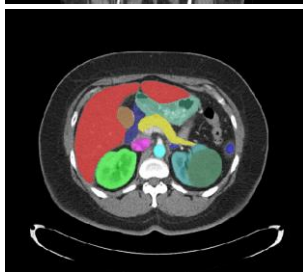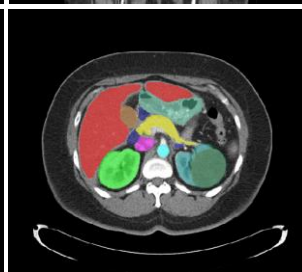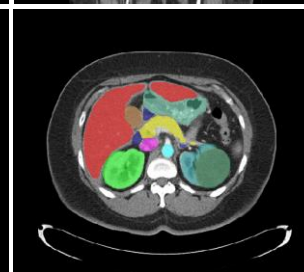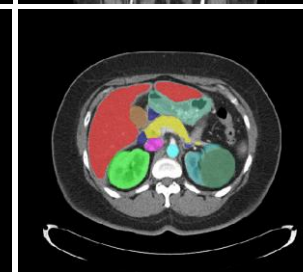

Image

Ground Truth

FSO

FST

StMt
